# Supplementary material for: The Production of Helianthus Haploids: A Review of Its Current Status and Future Prospects
Source: Plants (Basel). 2022 Oct 29;11(21):2919. doi: 10.3390/plants11212919 (PMC9654405; doi:10.3390/plants11212919)
Supplement: Supplementary file 1 [file plants-11-02919-s001.zip › plants-1911895-supplementary.pdf]

**Table S1:** Similarities and differences in the structural organization of formed sunflower zygotic and gynogenic haploids (according to [82]).

| Trait/organelle                       | Zygotic embryo                                                                                                                                                                                                                                                                                                                                                                                                                                                                           | Gynogenic embryo                                                                                                                                                                                                                                                 |
|---------------------------------------|------------------------------------------------------------------------------------------------------------------------------------------------------------------------------------------------------------------------------------------------------------------------------------------------------------------------------------------------------------------------------------------------------------------------------------------------------------------------------------------|------------------------------------------------------------------------------------------------------------------------------------------------------------------------------------------------------------------------------------------------------------------|
| <b>Zygote/activated ovule</b>         |                                                                                                                                                                                                                                                                                                                                                                                                                                                                                          |                                                                                                                                                                                                                                                                  |
| Time moment of ovule activation       | Several hours after fertilization                                                                                                                                                                                                                                                                                                                                                                                                                                                        | Several days after the start of <i>in vitro</i> ovule cultivation                                                                                                                                                                                                |
| Structural organization of organelles | Increase in the number and metabolic activity of organelles during development: numerous plastids localized to the periphery and mitochondria with well-developed cristae; increase in the Golgi apparatus and endoplasmic reticulum (ER). Decrease in the density of the ribosomes situated near the periphery of nucleus, on the outer nuclear membrane, and in the cytoplasm with maturation. Migration of the nucleus to the center from its typical position near the chalazal pole |                                                                                                                                                                                                                                                                  |
| Number of lipid inclusions            | Lower                                                                                                                                                                                                                                                                                                                                                                                                                                                                                    | Higher                                                                                                                                                                                                                                                           |
| Vacuoles                              | Numerous small vacuoles in the micropyle end, demonstrating the presence of polarity                                                                                                                                                                                                                                                                                                                                                                                                     | Increased in size and more evenly distributed in the cytoplasm, suggesting a decrease in the initial polarity or its disappearance                                                                                                                               |
| Cell wall                             | Zygote divides <i>in vivo</i> before the cell wall is formed at the chalazal end                                                                                                                                                                                                                                                                                                                                                                                                         | During the cultivation, the cell wall completes its formation around the egg cell (including the chalazal end) before the first division                                                                                                                         |
| <b>Proembryo</b>                      |                                                                                                                                                                                                                                                                                                                                                                                                                                                                                          |                                                                                                                                                                                                                                                                  |
| Structural organization of organelles | High density of ribosomes and mitochondria; diversity of Golgi bodies with numerous bubbles, well-developed ER; and disappearance of lipid droplets                                                                                                                                                                                                                                                                                                                                      |                                                                                                                                                                                                                                                                  |
| Development rate and uniformity       | More rapid and more uniform                                                                                                                                                                                                                                                                                                                                                                                                                                                              | Slower and less uniform; some nuclei are subject to free division giving coenocytes                                                                                                                                                                              |
| Vacuoles                              | Lower number of vacuoles; autophagic vacuoles are formed only in the suspensor                                                                                                                                                                                                                                                                                                                                                                                                           | Larger number of vacuoles; autophagic vacuoles are frequently formed in embryoid and suspensor                                                                                                                                                                   |
| Position of embryoid in embryo sac    | Suspensor is directed towards the micropyle end and embryoid cells, to the chalazal-end; this is most likely associated with the uptake of nutrients through the chalazal end                                                                                                                                                                                                                                                                                                            | Electron dense cells in the micropyle end give rise to embryoid; electron light cells resembling suspensor reside in the chalazal end. Embryos with normal polarity are developed; this may be associated with the uptake of nutrients through the micropyle end |
| Cell walls                            | Thicker cell walls; formed through the phragmoplast immediately after each mitosis                                                                                                                                                                                                                                                                                                                                                                                                       | Thinner cell walls; formed in a fragmentary manner; their centripetal growth is observed                                                                                                                                                                         |
